# Supplementary material for: Dual chain extension effect and antibacterial properties of biomolecules interleaved within LDH dispersed into PBS by in situ polymerization
Source: Royal Society of Chemistry journal article supplement (doi:10.1039/c7dt03914j), 2018-01-01

## Dual chain extension effect and antibacterial properties of biomolecules interleaved within LDH dispersed into PBS by *in situ* polymerization

Grazia Totaro, Laura Sisti, Annamaria Celli, Irene Aloisio, Diana Di Gioia, Adam A. Marek, Vincent Verney, Fabrice Leroux

FIGURE S1. TGA and DTGA traces of *in situ* PBS nanocomposites

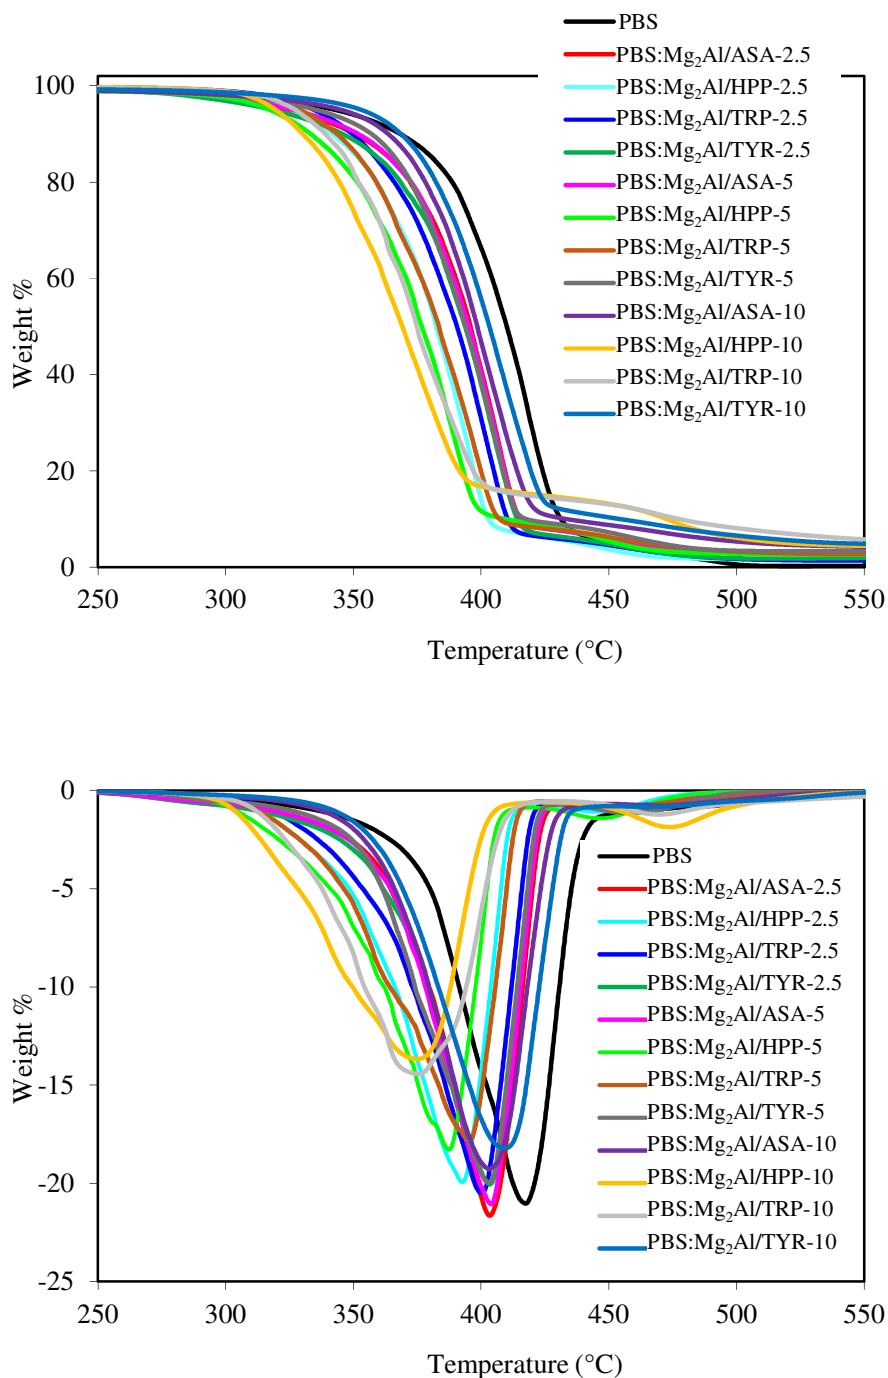

FIGURE S2. DSC traces of *in situ* PBS nanocomposites (heating scans and cooling scans)

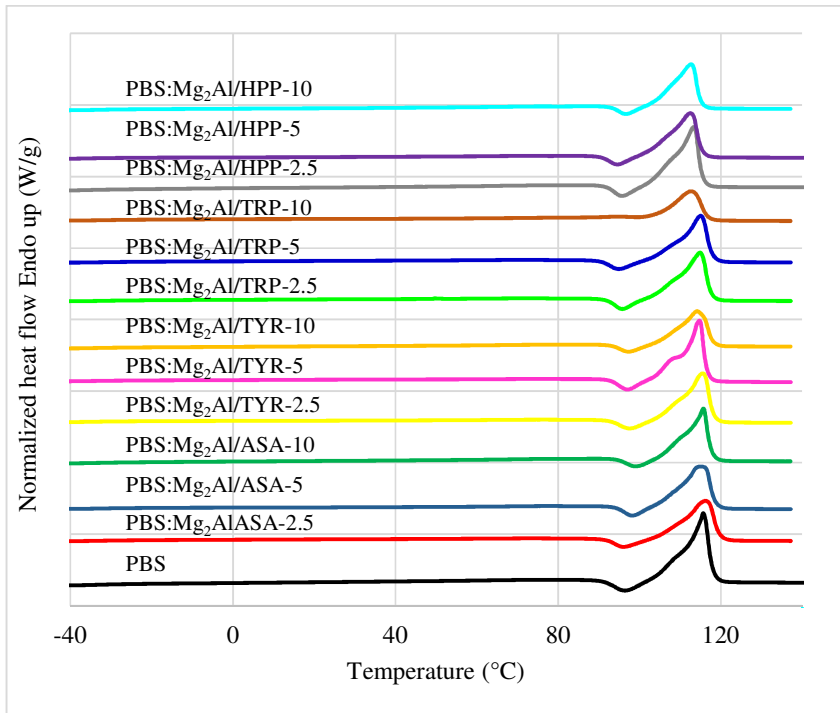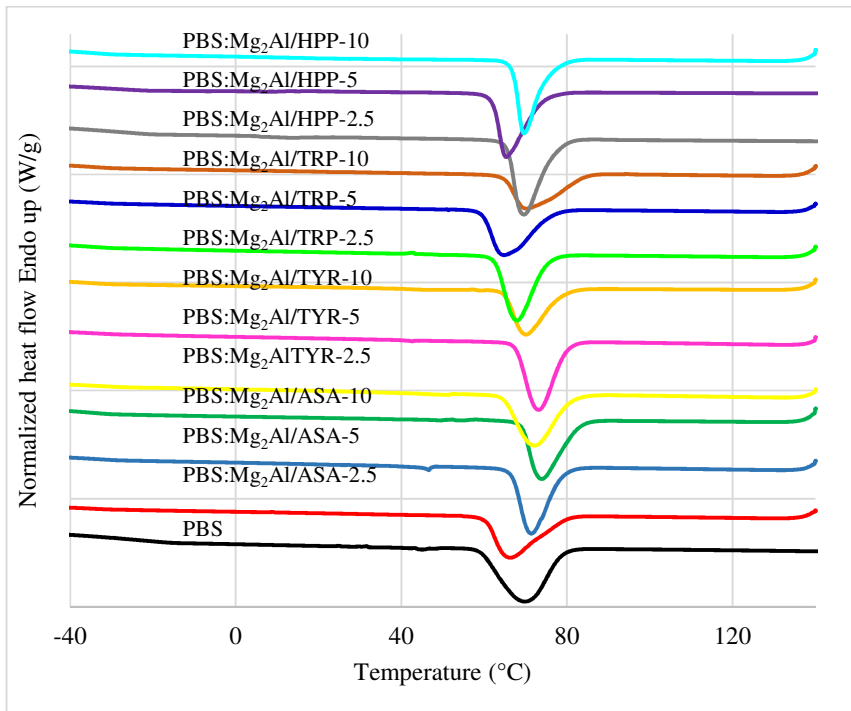

Supplement: c7dt03914j1.pdf [file c7dt03914j1.pdf]
